# Supplementary material
Source: Springer Nature journal article supplement (https://www.springermedizin.de/resource/supplementary/12884_2004_44_MOESM1_ESM.pdf/9459496)

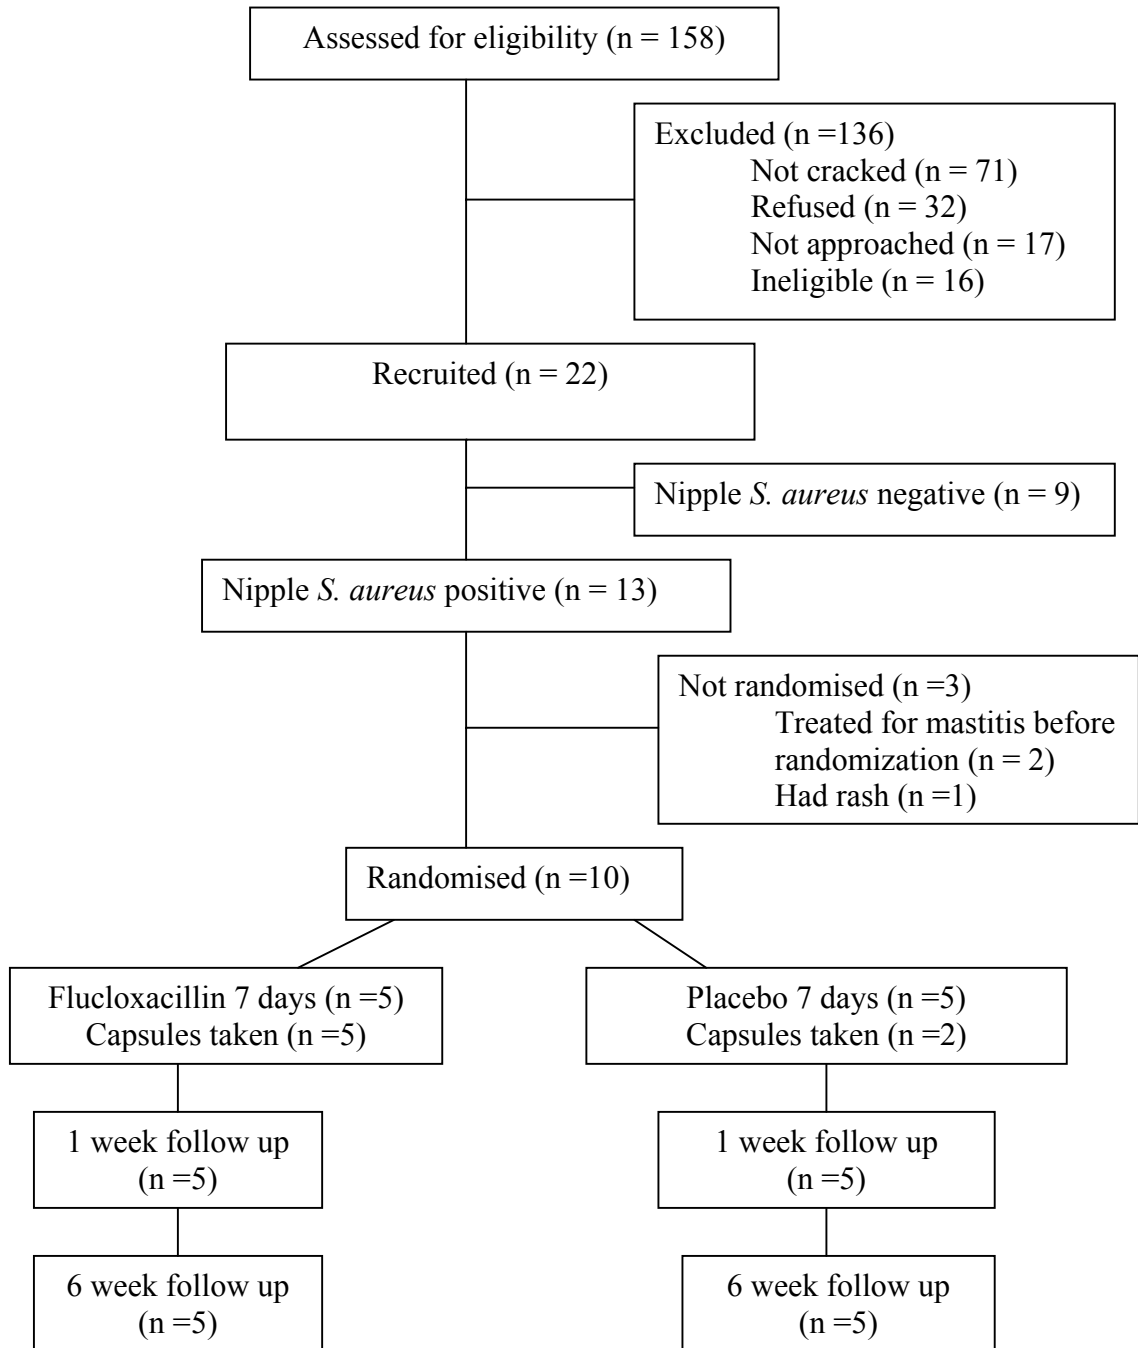

Supplement: MOESM1 [file 9459496]
